# Supplementary material for: Osmylated macroporous resins: safe, highly efficient and recyclable catalysts for asymmetric aminohydroxylation of olefinsElectronic supplementary information (ESI) available: experimental procedure. See http://www.rsc.org/suppdata/cc/b3/b303022a/
Source: Royal Society of Chemistry journal article supplement (doi:10.1039/b303022a), 2003-05-06
Supplement: b303022a.doc [file b303022a.doc]

# Supplementary data

*Typical Procedure for Asymmetric Aminohydroxylation (described for isopropyl trans-cinnamate).* In 3 mL of an aqueous solution of LiOH·H2O (42.8 mg, 1.02 mmol), XAD-4-Os complex (111.1 mg, 0.04 mmol) was suspended with stirring. After addition of *t*BuOH (6 mL), 1,4-bis(9-*O*-dihydroquininyl)phthalazine [(DHQ)2PHAL] (39.0 mg, 0.05 mmol) wad added, and the mixture was stirred for 10 min. After chiral ligand was dissolved completely, water (6 mL) was added subsequently, and the mixture was immersed in a cooling bath set to 4 oC. After addition of isopropyl *trans*-cinnamate (190.2 mg, 1 mmol), *N*-bromoacetamide (151.8 mg, 1.1 mmol) was added in one portion (which resulted in an immediate colour change to green) and the mixture was vigorously stirred at the same temperature. After completion of the reaction, the catalyst was filtered and washed with CH2Cl2. Saturated aqueous sodium sulfite and 1N HCl were added to the filtrate and the mixture was stirred for an additional hour. Organic product was extracted with CH2Cl2. After removing the solvent, the crude product was purified by chromatography on silica gel with EtOAc/hexanes to give 245.3 mg (93% yield, >99 %ee) of isopropyl (2*R*,3*S*)-(acetylamino)-2-hydroxy-3-phenyl propanoate. The chiral ligand was recovered (>95%) from the aqueous layer by usual acid-base work up. The recovered resins were reused for successive reactions.
